# Supplementary material for: Trifunctional Graphene Quantum Dot@LDH Integrated Nanoprobes for Visualization Therapy of Gastric Cancer
Source: PubMed Central journal article supplement (PMC11469055; doi:10.1002/adhm.202100512), 2021-06-10
Supplement: ADHM-10-2100512-s001.pdf [file ADHM-10-2100512-s001.pdf]

**ADVANCED  
HEALTHCARE  
MATERIALS**

Supporting Information

for *Adv. Healthcare Mater.*, DOI: 10.1002/adhm.202100512

Trifunctional graphene quantum dot @ LDH integrated  
nanoprobes for visualization therapy of gastric cancer

*Bin Wu, Kun Li, Feiyue Sun, Jintong Niu, Rongrong Zhu, Yechang  
Qian\* and Shilong Wang\**

## Supporting Information

**Trifunctional graphene quantum dot @ LDH integrated nanoprobes for visualization therapy of gastric cancer**

*Bin Wu, Kun Li, Feiyue Sun, Jintong Niu, Rongrong Zhu, Yechang Qian\* and Shilong Wang\**

**List of contents**

**Figure S1.** SEM images of LDH@SGQD (a) and LDH@SGQD-VP16 (b).

**Figure S2.** AFM images and height profile along the line A–B of LDH@SGQD (a), and LDH@SGQD-VP16 (b).

**Figure S3.** TEM-EDX of LDH@SGQD.

**Figure S4.** EDAX mapping of LDH@SGQD (a) and LDH@SGQD-VP16 (b). (Scale: 5  $\mu\text{m}$ ).

**Figure S5.** Zeta potential of LDH (a), SGQD (b), LDH@SGQD (c), VP16 (d), and LDH@SGQD-VP16 (e).

**Figure S6.** FTIR spectra of LDH, SGQD, and LDH@SGQD (a); LDH@SGQD, LDH@SGQD-VP16, and VP16 (b).

**Figure S7.** XRD analysis and the layer spacing calculation of (003) diffraction peak of LDH, LDH@SGQD, and LDH@SGQD-VP16.

**Figure S8.** TG analysis of LDH@SGQD and LDH@SGQD-VP16.

**Figure S9.** XPS spectrum. High-resolution O 1s (a), Mg 1s (b), and Al 2p (c) of LDH@SGQD and LDH@SGQD-VP16.

**Figure S10.** PLE spectra of SGQD, LDH@SGQD, and LDH@SGQD-VP16.

**Figure S11.** The sustained-release curve of LDH@GQD-VP16 in PBS of different pH values (pH 4.8, pH 5.8, and pH 7.0).

**Figure S12.** CLSM images of SGC7901 cells treated with LDH@SGQD-VP16 (80  $\text{mg L}^{-1}$ ) for 1 h, 6 h, 12 h and 24 h at 405 nm, 488 nm, and bright field. Scale: 20  $\mu\text{m}$ .

**Figure S13.** Growth inhibition assay. NIH 3T3 cells were incubated with LDH, SGQD and LDH@SGQD at different concentration (20  $\text{mg L}^{-1}$ , 40  $\text{mg L}^{-1}$ , 80  $\text{mg L}^{-1}$ , 160  $\text{mg L}^{-1}$ , and 320  $\text{mg L}^{-1}$ ) (a); LDH@SGQD-VP16, LDH@SGQD, and VP16 at different concentration (10  $\text{mg L}^{-1}$ , 20  $\text{mg L}^{-1}$ , 40  $\text{mg L}^{-1}$ , and 80  $\text{mg L}^{-1}$ ) for 48 h (b). The data in the figures represent the mean  $\pm$  SD ( $n = 4$ ).

**Figure S14.** Growth inhibition assay. SGC7901 cells were incubated with LDH@SGQD-VP16, LDH@SGQD, and VP16 at different concentration (10  $\text{mg L}^{-1}$ , 20  $\text{mg L}^{-1}$ , 40  $\text{mg L}^{-1}$ , and 80  $\text{mg L}^{-1}$ ) for 24h (a) and 48h (b). The data in the figures represent the mean  $\pm$  SD ( $n = 4$ ).

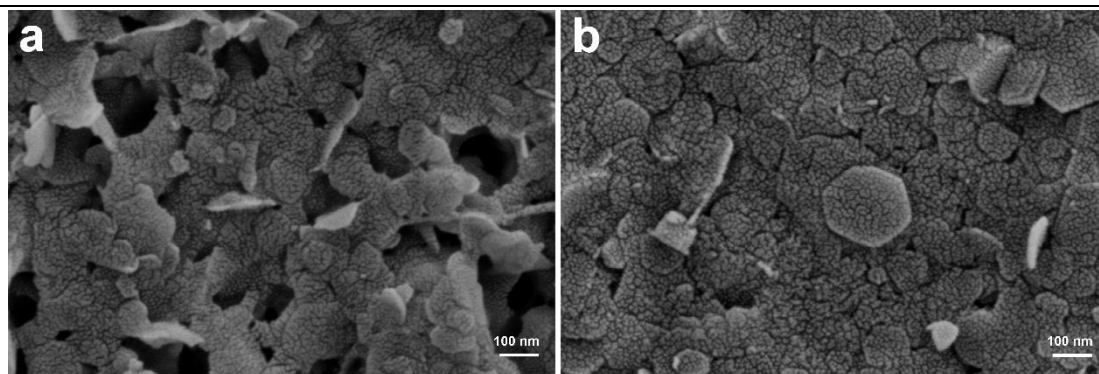

Figure S1. SEM images of LDH@SGQD (a) and LDH@SGQD-VP16 (b).

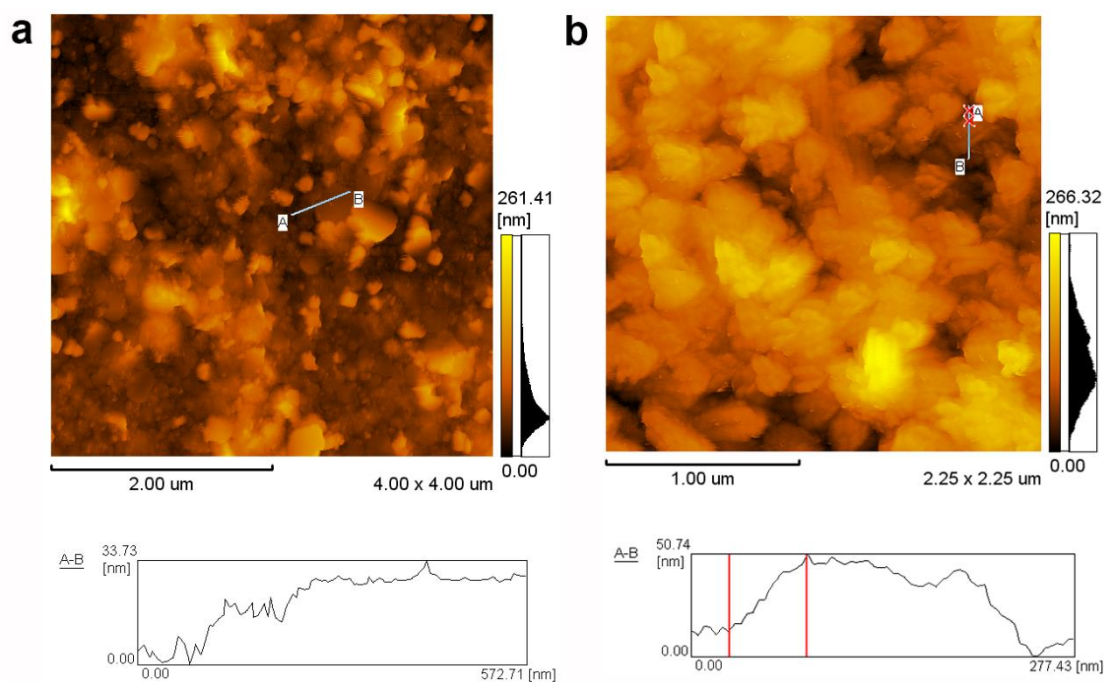

Figure S2. AFM images and height profile along the line A–B of LDH@SGQD (a) and LDH@SGQD-VP16 (b).

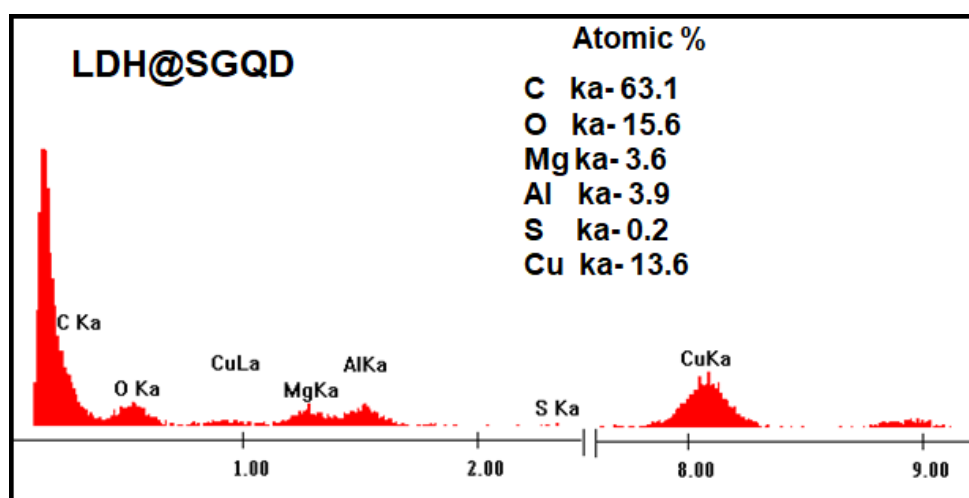

Figure S3. TEM-EDX of LDH@SGQD.

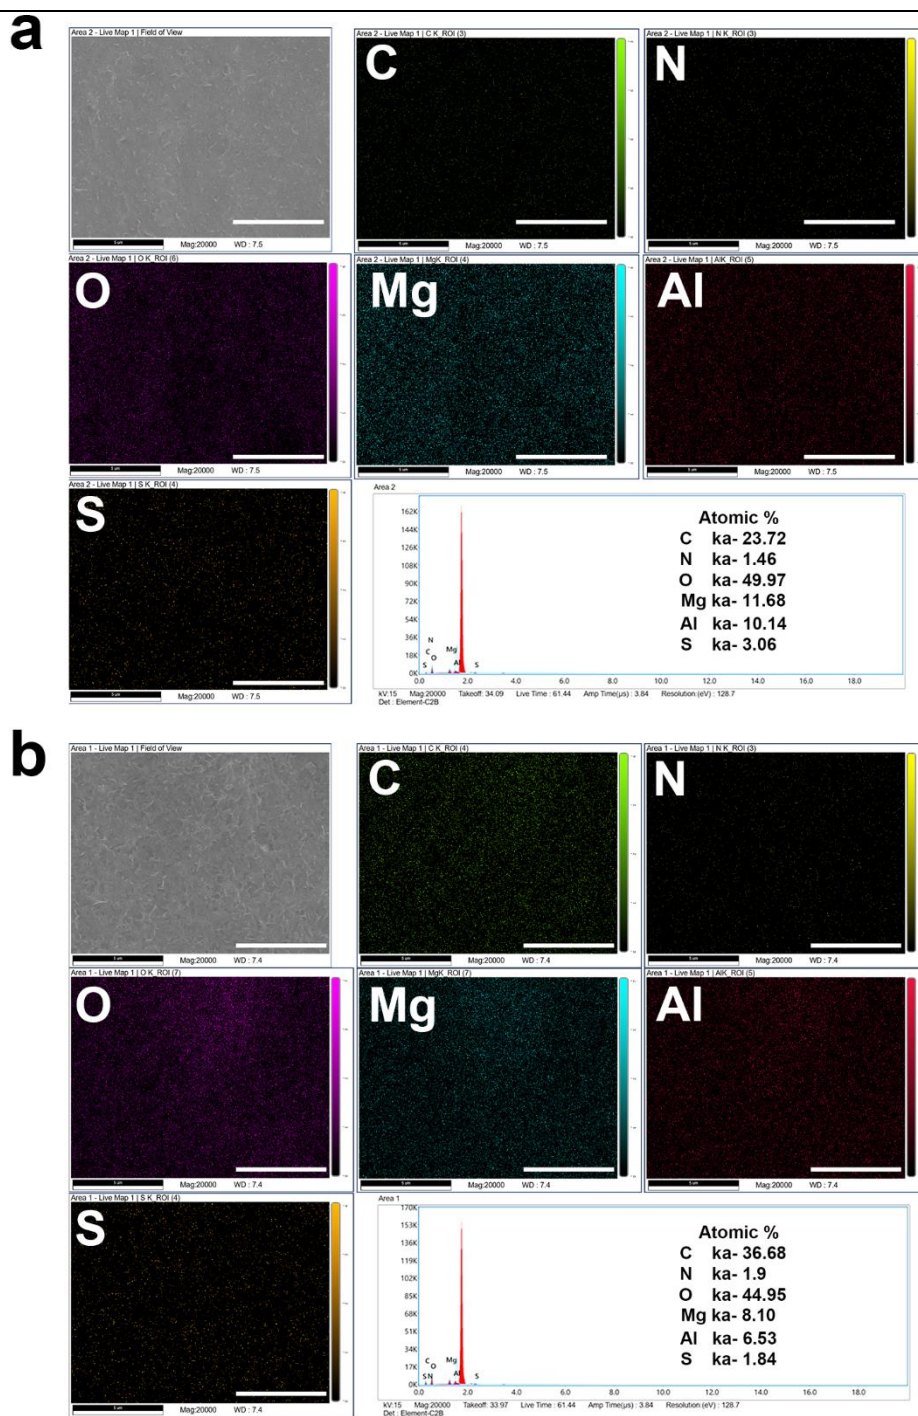

**Figure S4.** EDAX mapping of LDH@SGQD (a) and LDH@SGQD-VP16 (b). Scale: 5 μm.

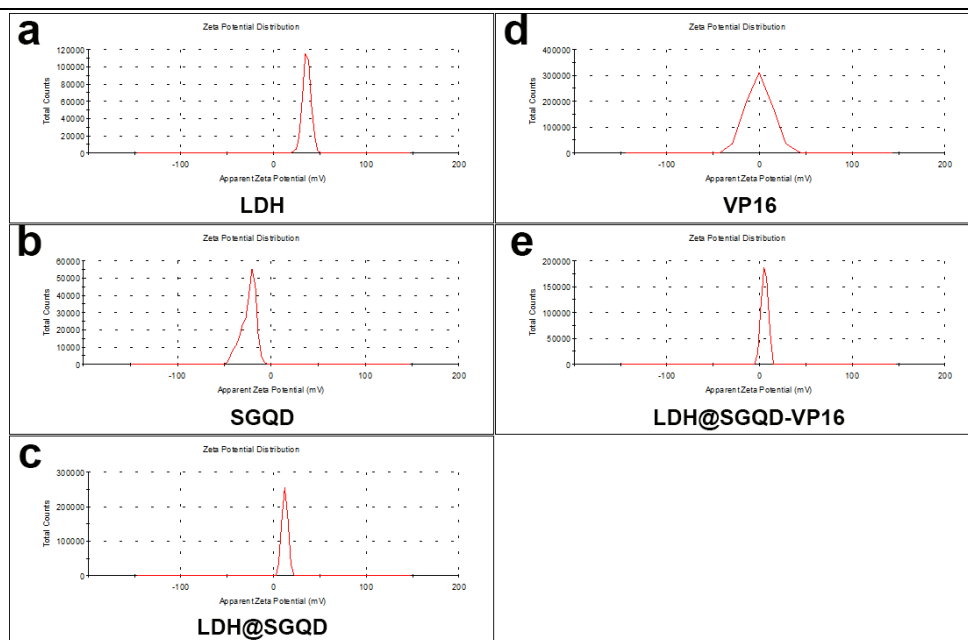

**Figure S5.** Zeta potential of LDH (a), SGQD (b), LDH@SGQD (c), VP16 (d), and LDH@SGQD-VP16 (e).

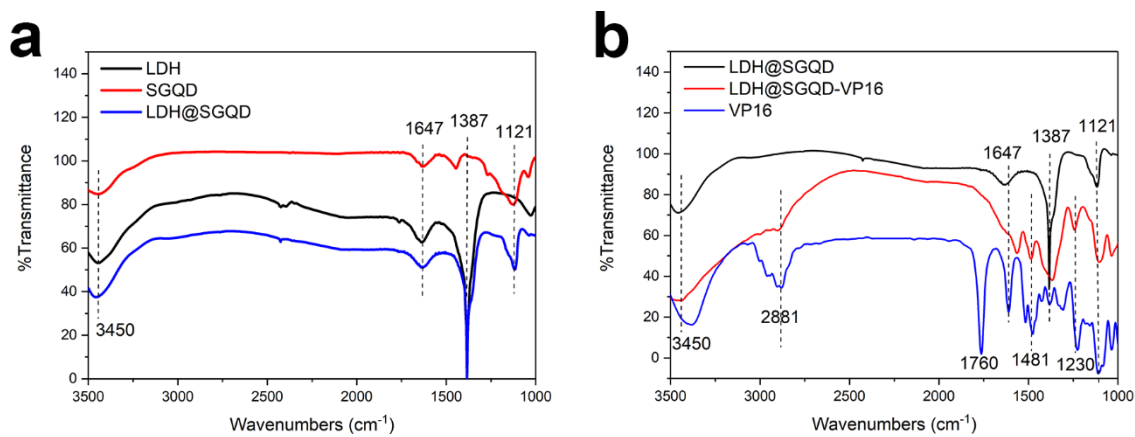

**Figure S6.** FTIR spectra of LDH, SGQD, and LDH@SGQD (a); LDH@SGQD, LDH@SGQD-VP16, and VP16.

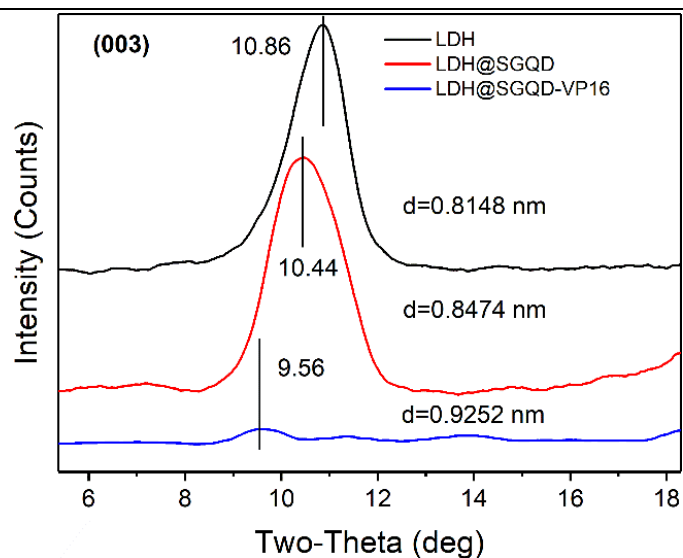

**Figure S7.** XRD analysis and the layer spacing calculation of (003) diffraction peak of LDH, LDH@SGQD, and LDH@SGQD-VP16.

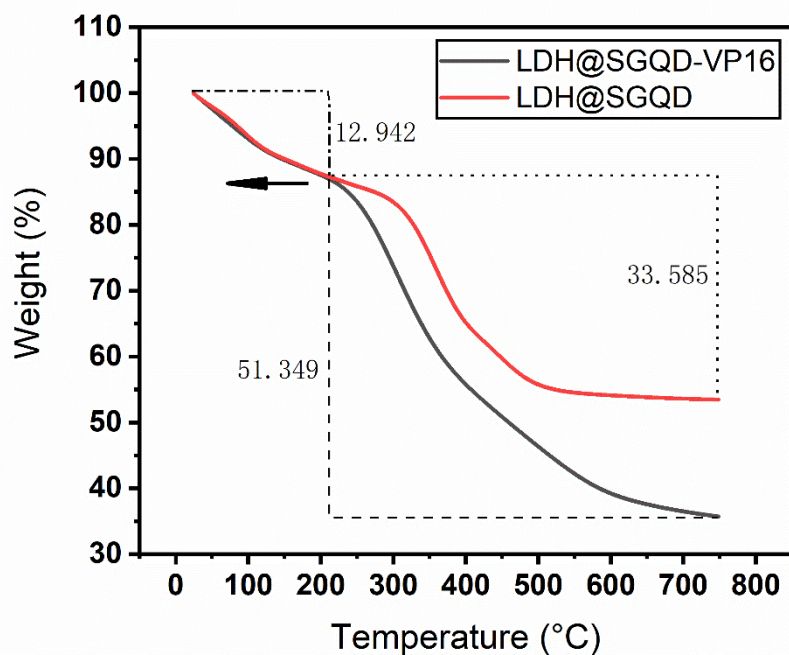

**Figure S8.** TG analysis of LDH@SGQD and LDH@SGQD-VP16.



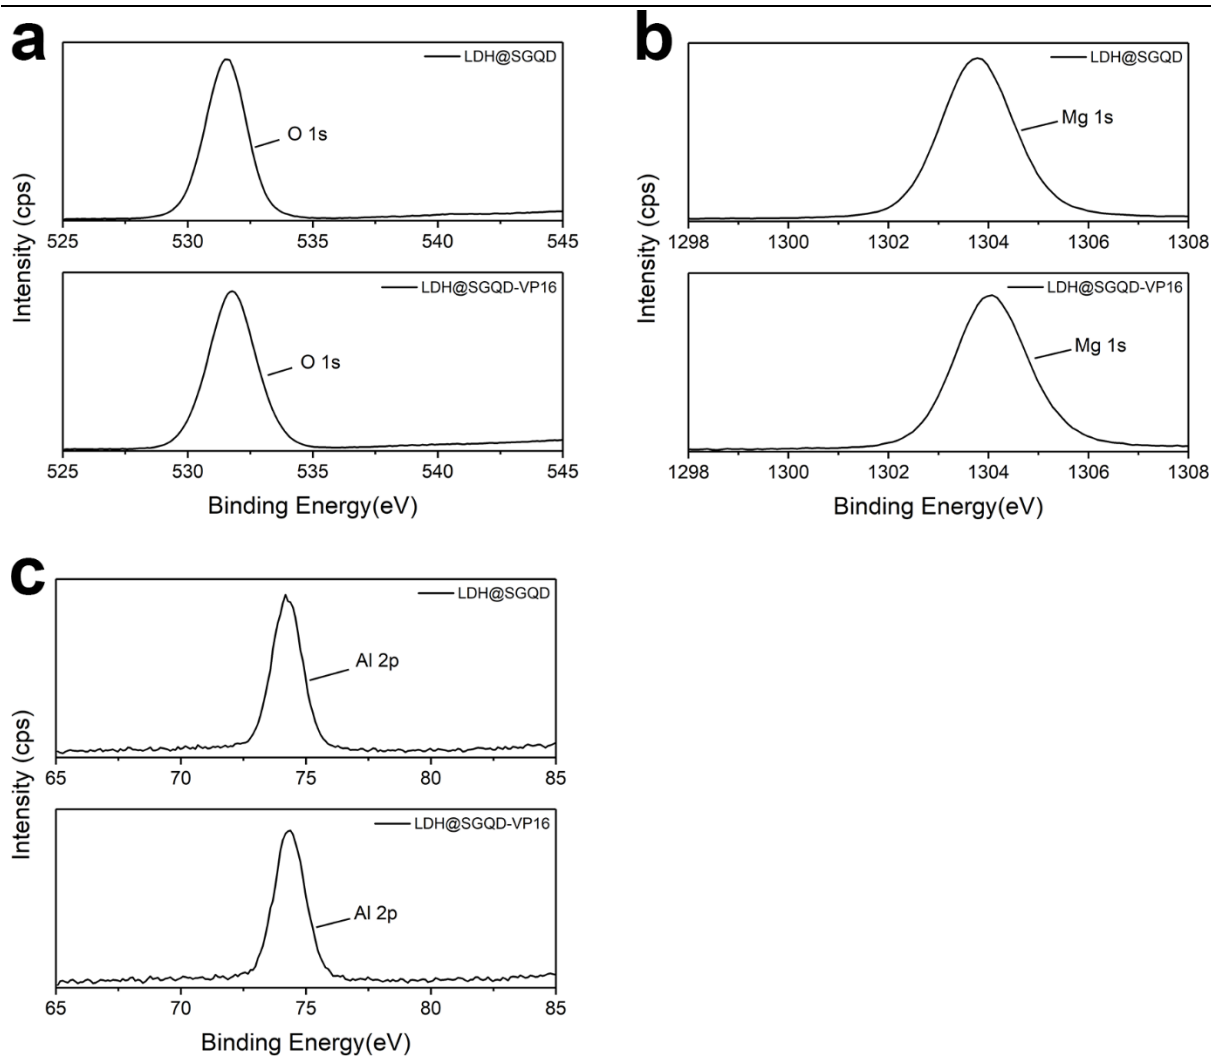

**Figure S9.** XPS spectrum. High-resolution O 1s (a), Mg 1s (b), and Al 2p (c) of LDH@SGQD and LDH@SGQD-VP16.

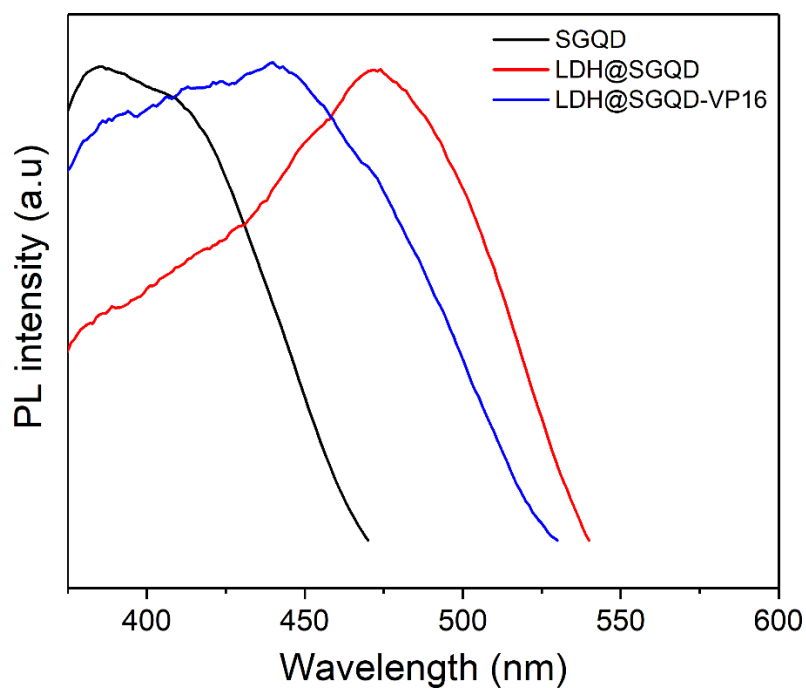

**Figure S10.** PLE spectra of SGQD, LDH@SGQD, and LDH@SGQD-VP16.

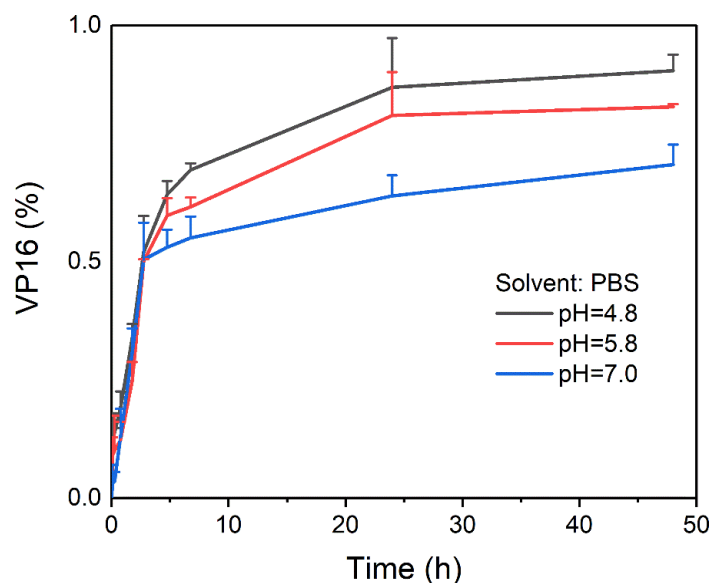

**Figure S11.** The sustained-release curve of LDH@GQD-VP16 in PBS of different pH values (pH 4.8, pH 5.8, and pH 7.0).

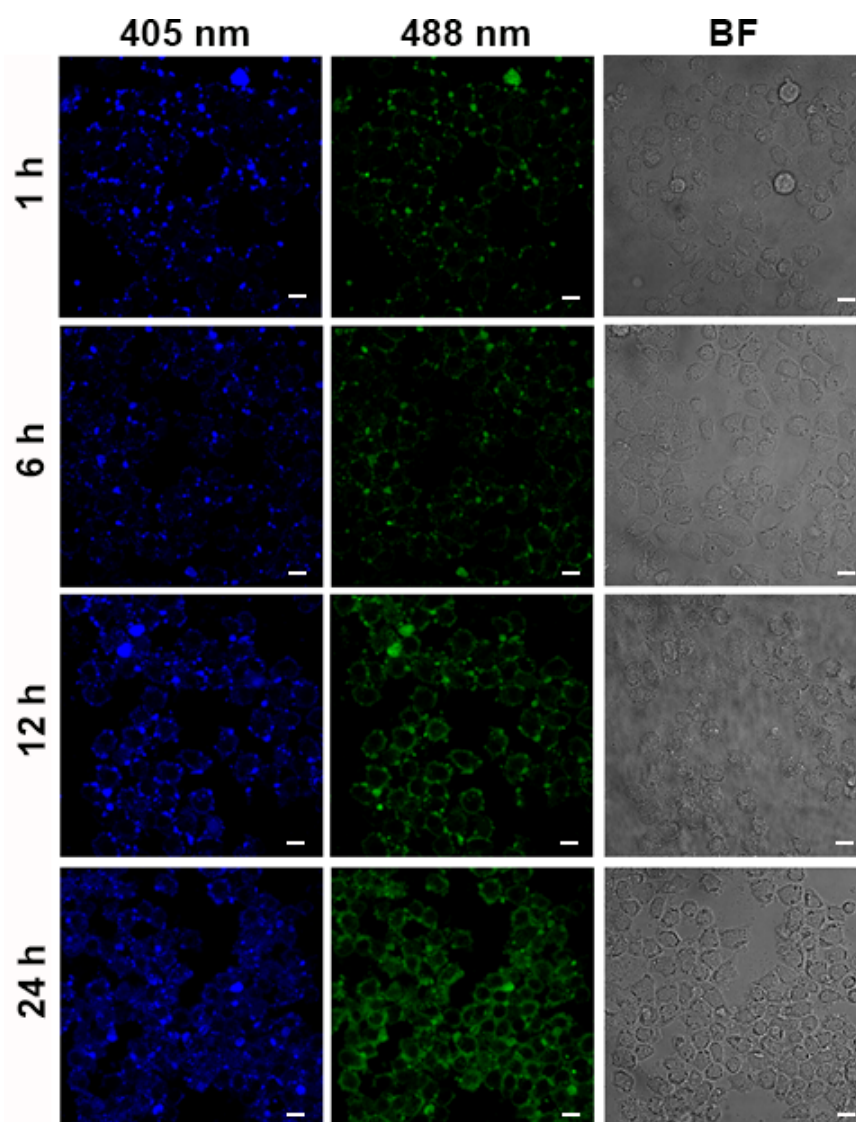

**Figure S12.** CLSM images of SGC7901 cells treated with LDH@SGQD-VP16 ( $80 \text{ mg L}^{-1}$ ) for 1 h, 6 h, 12 h, and 24 h at 405 nm, 488 nm and bright field. Scale:  $20 \mu\text{m}$ .



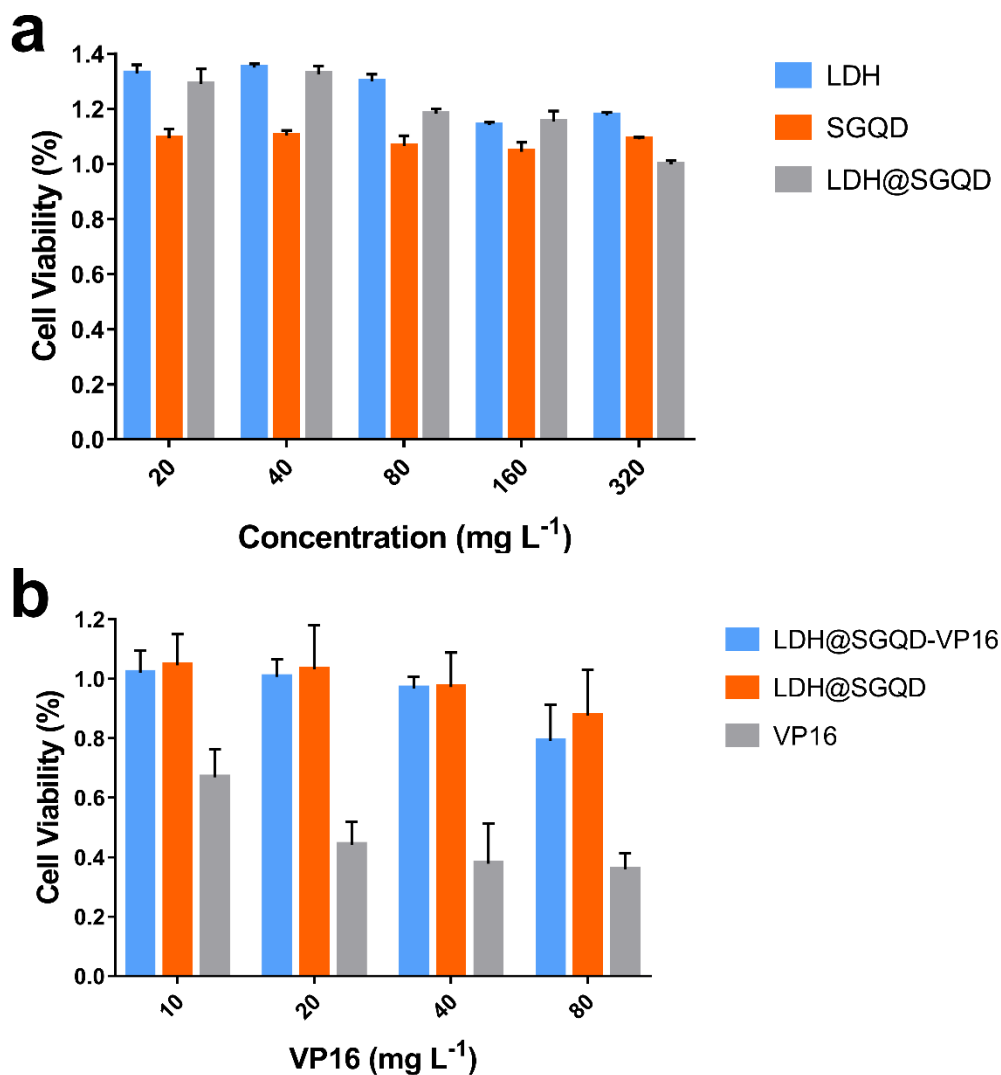

**Figure S13.** Growth inhibition assay. NIH 3T3 cells were incubated with LDH, SGQD, and LDH@SGQD at different concentration (20 mg L<sup>-1</sup>, 40 mg L<sup>-1</sup>, 80 mg L<sup>-1</sup>, 160 mg L<sup>-1</sup>, and 320 mg L<sup>-1</sup>) (a); LDH@SGQD-VP16, LDH@SGQD and VP16 at different concentration (10 mg L<sup>-1</sup>, 20 mg L<sup>-1</sup>, 40 mg L<sup>-1</sup>, and 80 mg L<sup>-1</sup>) for 48 h (b). The data in the figures represent the mean  $\pm$  SD ( $n = 4$ ).

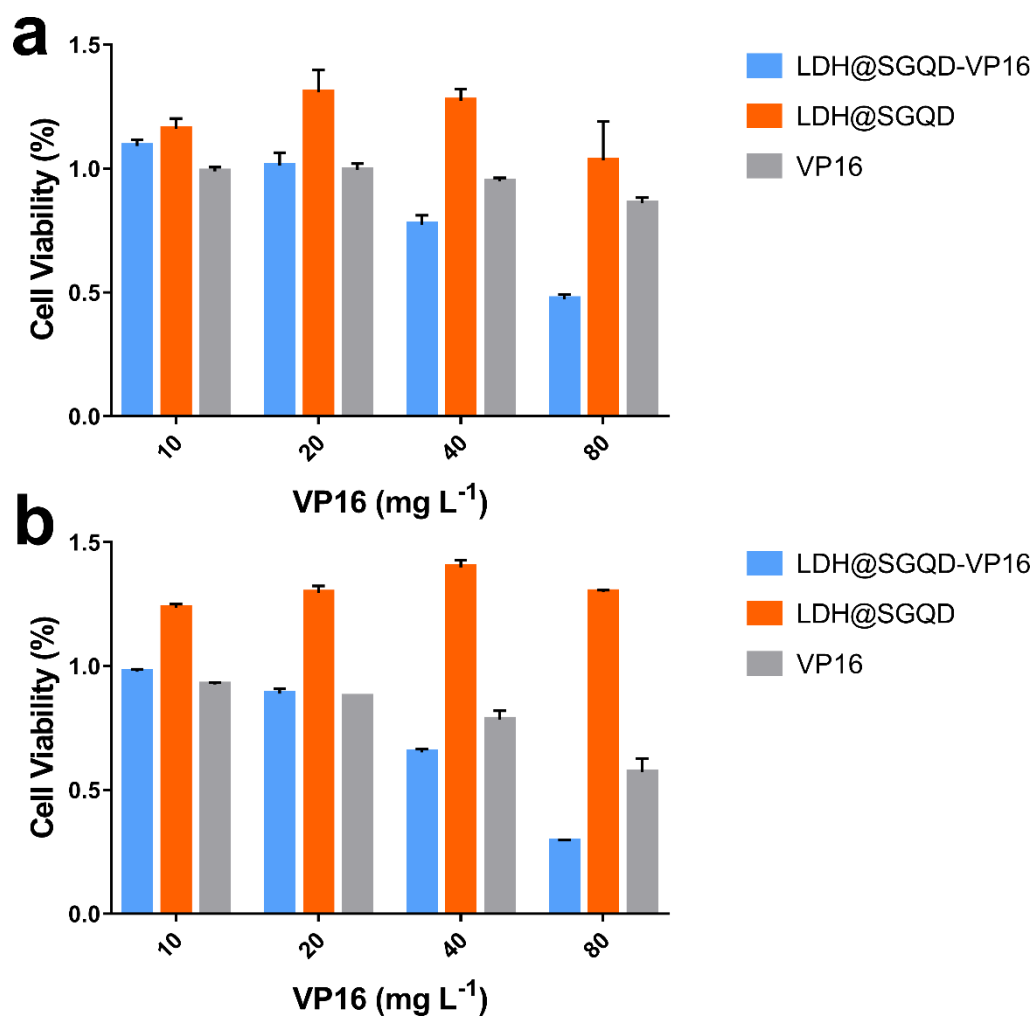

**Figure S14.** Growth inhibition assay. SGC7901 cells were incubated with LDH@SGQD-VP16, LDH@SGQD, and VP16 at different concentration (10 mg L<sup>-1</sup>, 20 mg L<sup>-1</sup>, 40 mg L<sup>-1</sup>, and 80 mg L<sup>-1</sup>) for 24h (a) and 48h (b). The data in the figures represent the mean  $\pm$  SD ( $n = 4$ ).
